# Supplementary material for: Assessment of Performance of the Industrial Process of Bulk Vacuum Packaging of Raw Meat with Nondestructive Optical Oxygen Sensing Systems
Source: Sensors (Basel). 2018 May 2;18(5):1395. doi: 10.3390/s18051395 (PMC5981195; doi:10.3390/s18051395)
Supplement: Supplementary file 1 [file sensors-18-01395-s001.pdf]

## Supplementary Information

A.

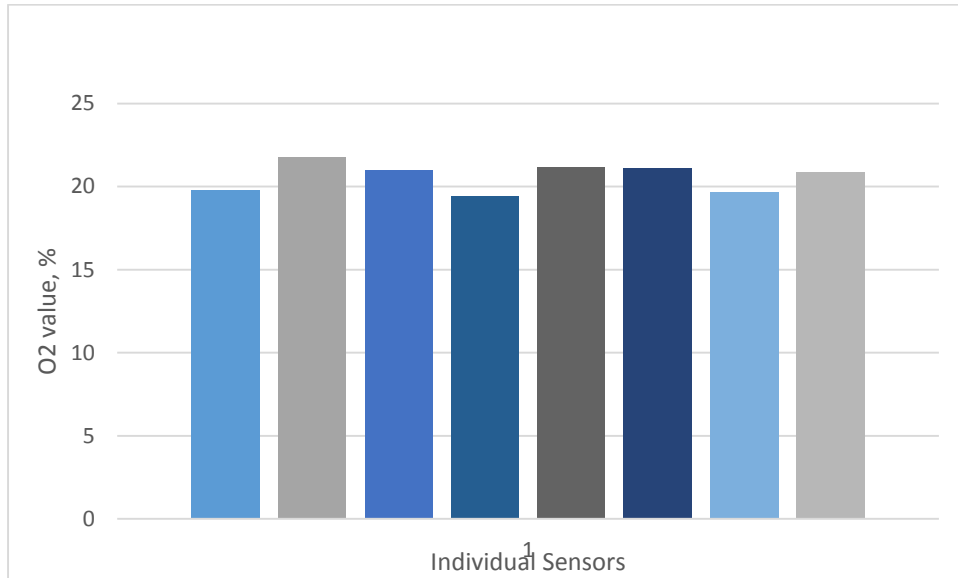

B.

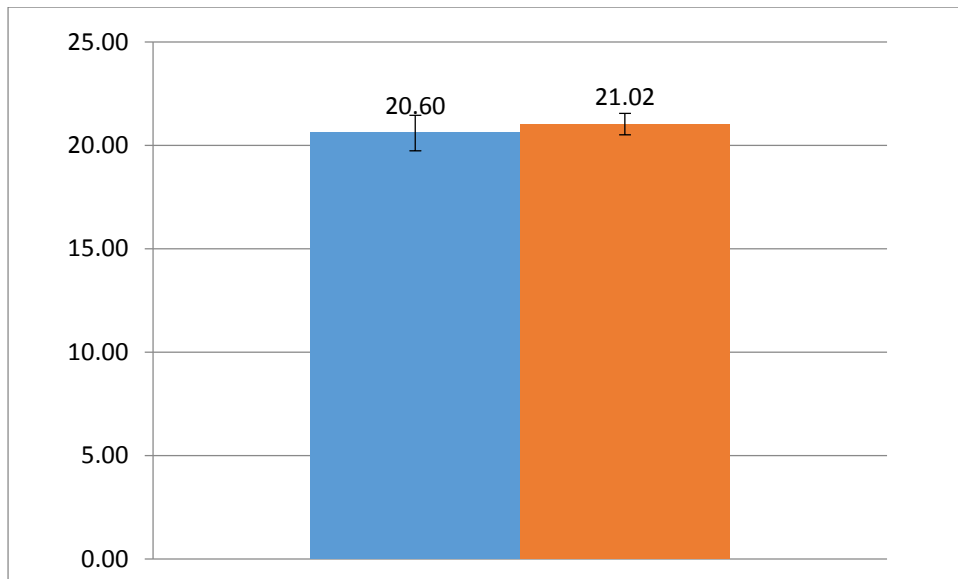

**Figure S1.** Measurement of O<sub>2</sub> with Optech sensors at 1 °C. (A) Readings from 8 individual sensors under standard experimental conditions (1 °C, 20.86% O<sub>2</sub>) produced with an Optech-O<sub>2</sub> Platinum reader calibrated with CalCard at 1 °C. (B) O<sub>2</sub> readings from the same sensors measured at 1°C (blue bar) and 22 °C (orange bar). Mean O<sub>2</sub> values are  $20.6 \pm 0.8$  and  $21.0 \pm 0.5$ , respectively. Calculated p-value of 0.12 shows that the difference is not significant ( $p > 0.05$ , N = 8). Temperature readings at 1 °C were  $1.7 \pm 1.0$  °C, and at 22 °C— $22.0 \pm 0.1$  °C.
